# Supplementary material for: Biodegradable Nonwovens with Poultry Feather Addition as a Method for Recycling and Waste Management
Source: MDPI journal article supplement (doi:10.3390/polym14122370), 2022-06-11

Table S1. SEM photodocementaion of samples

| group | nonwoven            | SEM<br>100x                                                                         | SEM<br>500x                                                                          |
|-------|---------------------|-------------------------------------------------------------------------------------|--------------------------------------------------------------------------------------|
| I     | nonwoven I<br>"0"   | 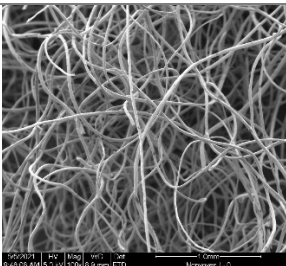   |    |
|       | nonwoven I          |    |    |
|       | nonwoven II<br>"0"  |   |   |
|       | nonwoven II         |  |  |
|       | nonwoven III<br>"0" |  |  |
|       | nonwoven III        |  |  |

|                |                                                                                                                                                                          |                                                                                                                                                                             |
|----------------|--------------------------------------------------------------------------------------------------------------------------------------------------------------------------|-----------------------------------------------------------------------------------------------------------------------------------------------------------------------------|
| DA I/1         | 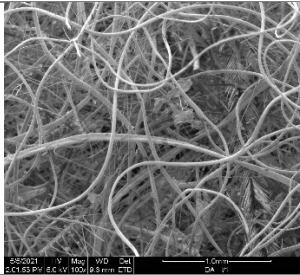 <p>5820021 HV Mag WD Det<br/>2.04 kV 100x 100mm CTD<br/>1.0mm<br/>DA I/1</p>           |  <p>5820021 HV Mag WD Det<br/>2.04 kV 500x 500mm CTD<br/>500.0um<br/>DA I/1</p>           |
| DA „0” I/1     |  <p>5820021 HV Mag WD Det<br/>1.33 kV 100x 100mm CTD<br/>1.0mm<br/>DA „0” I/1</p>       |  <p>5820021 HV Mag WD Det<br/>1.33 kV 500x 500mm CTD<br/>500.0um<br/>DA „0” I/1</p>       |
| DA I 1i2       |  <p>5820021 HV Mag WD Det<br/>5.19 kV 100x 100mm CTD<br/>1.0mm<br/>DA I 1i2</p>        |  <p>5820021 HV Mag WD Det<br/>5.22 kV 500x 500mm CTD<br/>500.0um<br/>DA I 1i2</p>        |
| DA „0” I/1and2 |  <p>5820021 HV Mag WD Det<br/>5.08 kV 100x 100mm CTD<br/>1.0mm<br/>DA „0” I/1and2</p> |  <p>5820021 HV Mag WD Det<br/>5.16 kV 500x 500mm CTD<br/>500.0um<br/>DA „0” I/1and2</p> |
| DA I/2         |  <p>5820021 HV Mag WD Det<br/>5.36 kV 100x 100mm CTD<br/>1.0mm<br/>DA I/2</p>         |  <p>5820021 HV Mag WD Det<br/>5.41 kV 500x 500mm CTD<br/>500.0um<br/>DA I/2</p>         |
| DA „0” I/2     |  <p>5820021 HV Mag WD Det<br/>5.36 kV 100x 100mm CTD<br/>1.0mm<br/>DA „0” I/2</p>     |  <p>5820021 HV Mag WD Det<br/>5.31 kV 500x 500mm CTD<br/>500.0um<br/>DA „0” I/2</p>     |

DA II/2

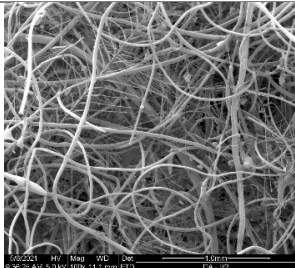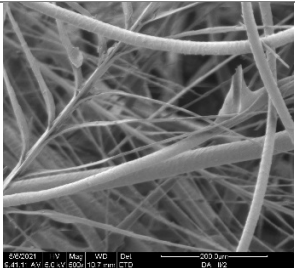

DA „0” II/2

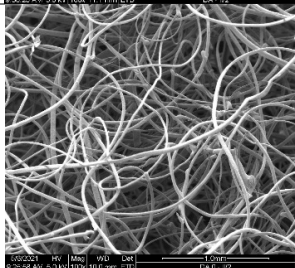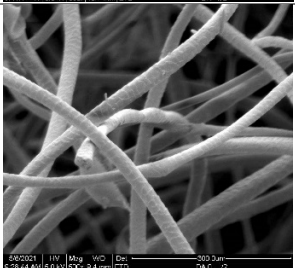

Supplement: s1 [file s1]
